# Supplementary material for: Nectin like-5 overexpression correlates with the malignant phenotype in cutaneous melanoma
Source: PubMed Central journal article supplement (PMC3478464; doi:10.18632/oncotarget.594), 2012-08-26
Supplement: oncotarget-08-882-s001.pdf [file oncotarget-08-882-s001.pdf]

# Nectin like -5 overexpression correlates with the malignant phenotype in cutaneous melanoma - Valentina Bevelacqua et al

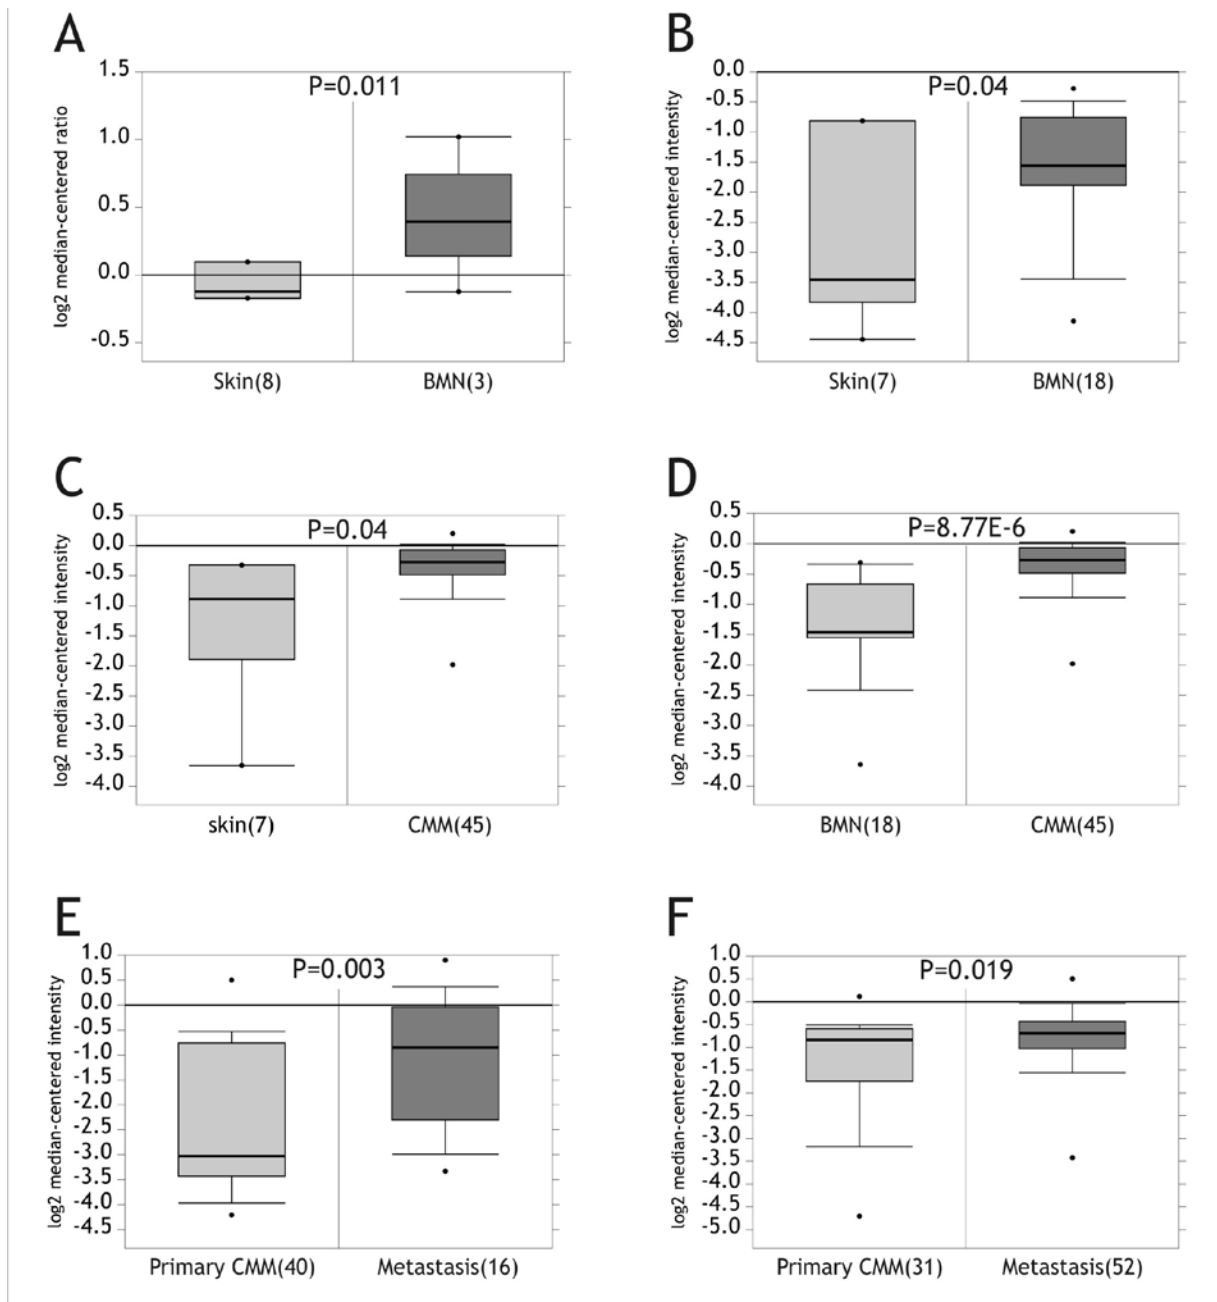

Supplementary Figure 1: Bioinformatic analysis of NECL-5 by ONCOMINE software in different publicly available datasets (see Supplementary Table 1). Differential mRNA expression analyses among normal skin tissue versus benign melanocytic skin nevus (BMN) (A and B); normal skin versus melanoma cutaneous malignant melanoma (CMM) (C); BMN versus CMM (D); Primary melanoma versus metastatic melanoma (E).

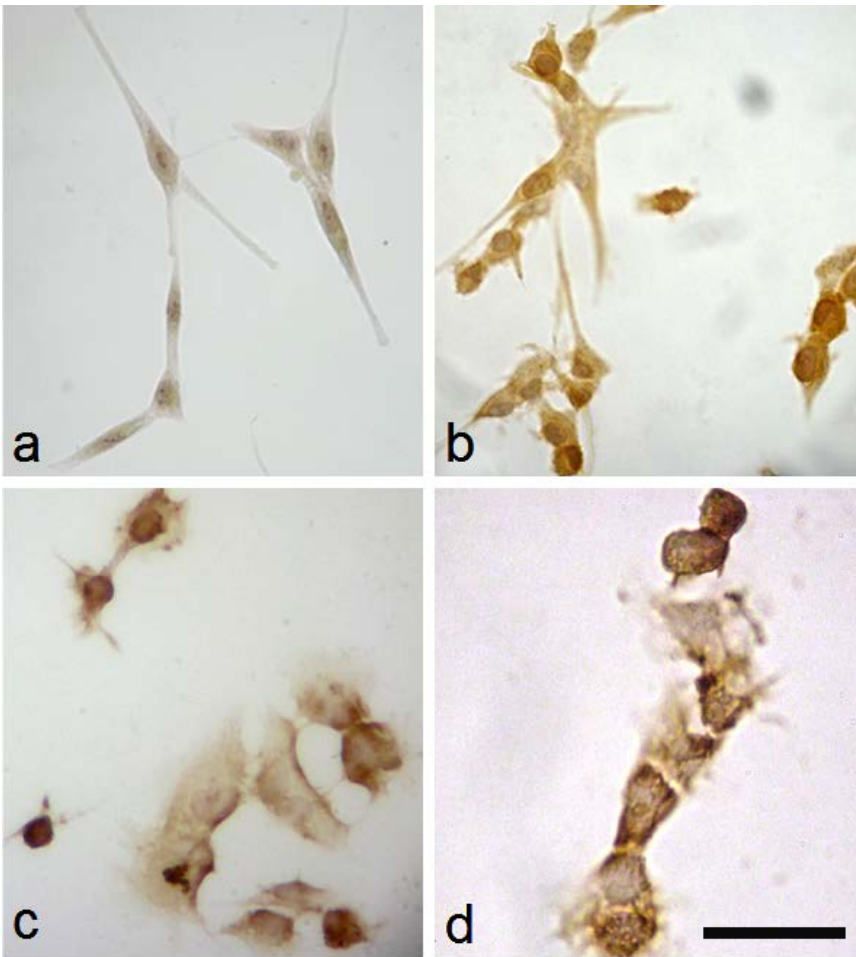

Supplementary Figure 2: Immunolabelling for NECL-5 protein in normal melanocytes and melanoma cell lines. In NHEM (a), the immunostaining is almost absent. MW35 (b), A375 (c) and M14 (d) cells are discretely labelled for NECL-5. The protein is mainly localized on cell membrane as well as on the cell leading edge (bar: 50  $\mu$ m).

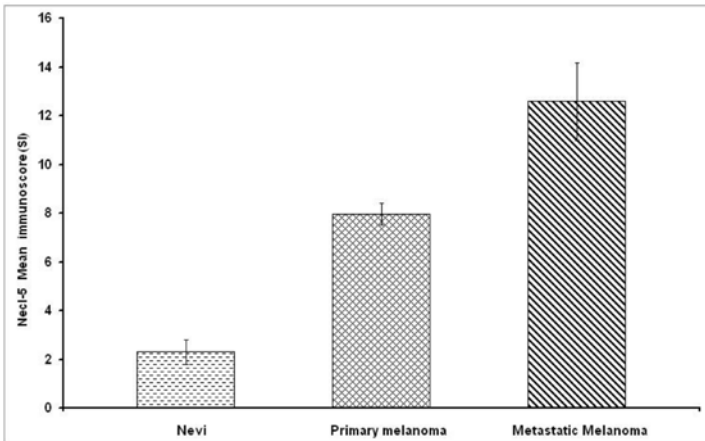

Supplementary Figure 3: The mean  $\pm$  SE of the staining in benign nevi, primary and metastatic melanoma samples. Both primary and metastatic melanoma showed significantly higher level of NECL-5 expression than nevi ( $P < 0.0001$ ).

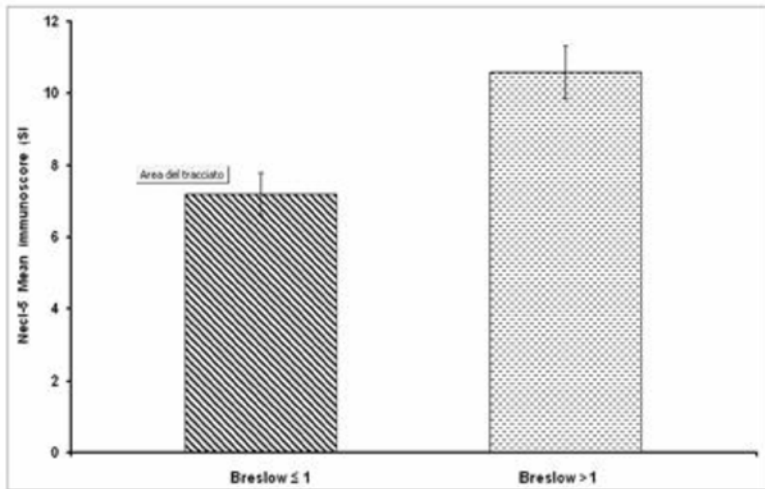

**A**

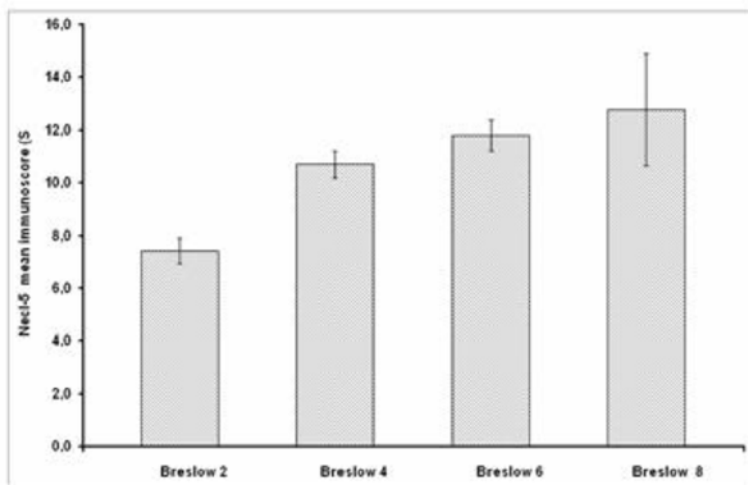

**B**

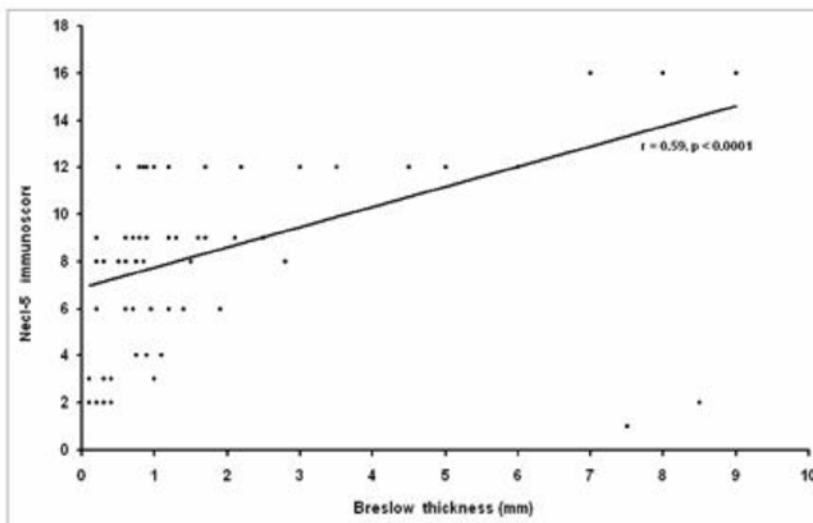

**C**

Supplementary Figure 4: Differences of NECL-5 immunoreactive scores in melanoma samples with Breslow  $\leq 1$  mm and those with thickness  $> 1$  mm. NECL-5 immunoreactive scores were higher in thick (score: mean  $10.53 \pm 0.74$ ,  $P = 0.003$ ) than in thin melanomas (score: mean  $7.51 \pm 0.59$ ) (4a). NECL-5 immunoreactive scores in different Breslow levels of melanoma samples (4b). Correlation between NECL-5 expression and Breslow tumor thickness by Spearman rank test ( $r = 0.59$ ,  $P = 0.0001$ ) (4c).
