# Supplementary material for: Nectin like-5 overexpression correlates with the malignant phenotype in cutaneous melanoma
Source: PubMed Central journal article supplement (PMC3478464; doi:10.18632/oncotarget.594), 2012-08-26
Supplement: oncotarget-08-882-s002.pdf [file oncotarget-08-882-s002.pdf]

**Nectin like -5 overexpression correlates with the malignant phenotype in cutaneous melanoma -  
Valentina Bevelacqua et al**

**Supplementary Table 1: Fold change values of PVR gene expression**

| Analysis Type             | N. of samples |                 | fold change | P < 0.05 (T-test) | Data set                |      |                |
|---------------------------|---------------|-----------------|-------------|-------------------|-------------------------|------|----------------|
|                           |               |                 |             |                   | Author (ref.)           | Year | Platform       |
| Skin vs BMN               | normal(7)     | nevus(18)       | 2.227       | 0.04              | Talantov D <i>et al</i> | 2005 | U133A          |
| Skin vs CMM               | normal(7)     | cancer(45)      | 1.896       | 0.04              | Talantov D <i>et al</i> | 2005 | U133A          |
| BMN vs CMM                | nevus(18)     | cancer(45)      | 2.055       | 8.77E-06          | Talantov D <i>et al</i> | 2005 | U133A          |
| Primary CMM vs Metastasis | primary(16)   | metastasis (40) | 2.384       | 0.003             | Riker A <i>et al</i>    | 2008 | U133A plus 2.0 |
| Primary CMM vs Metastasis | primary(31)   | metastasis (52) | 1.394       | 0.019             | Xu L <i>et al</i>       | 2008 | U133A          |

**Supplementary Table 2: Comparison expression of NECL-5 in melanoma cell lines**

|                             |                                                                   |
|-----------------------------|-------------------------------------------------------------------|
| Melanoma cell lines         | Intensity and percentage of positive cells in melanoma cell lines |
| Normal melanocytes          | +/+                                                               |
| WM35 (primary melanoma)     | +++ /+++                                                          |
| A 375 (metastatic melanoma) | ++++ /++++                                                        |
| M14 (metastatic melanoma)   | ++++ /++++                                                        |

Intensity of immunostaining was graded as follows: 4+, very strong; and 1+, weak, and 0, no staining. Intensity score was graded as follows: 4+, diffuse staining of all melanocytes, 3+, about 75% and 2+, about 50 % and 1+, less than 25%, 0, negative.
